# Supplementary material
Source: Springer Nature journal article supplement (https://www.springermedizin.de/resource/supplementary/12888_2014_1615_MOESM4_ESM.pdf/9480970)

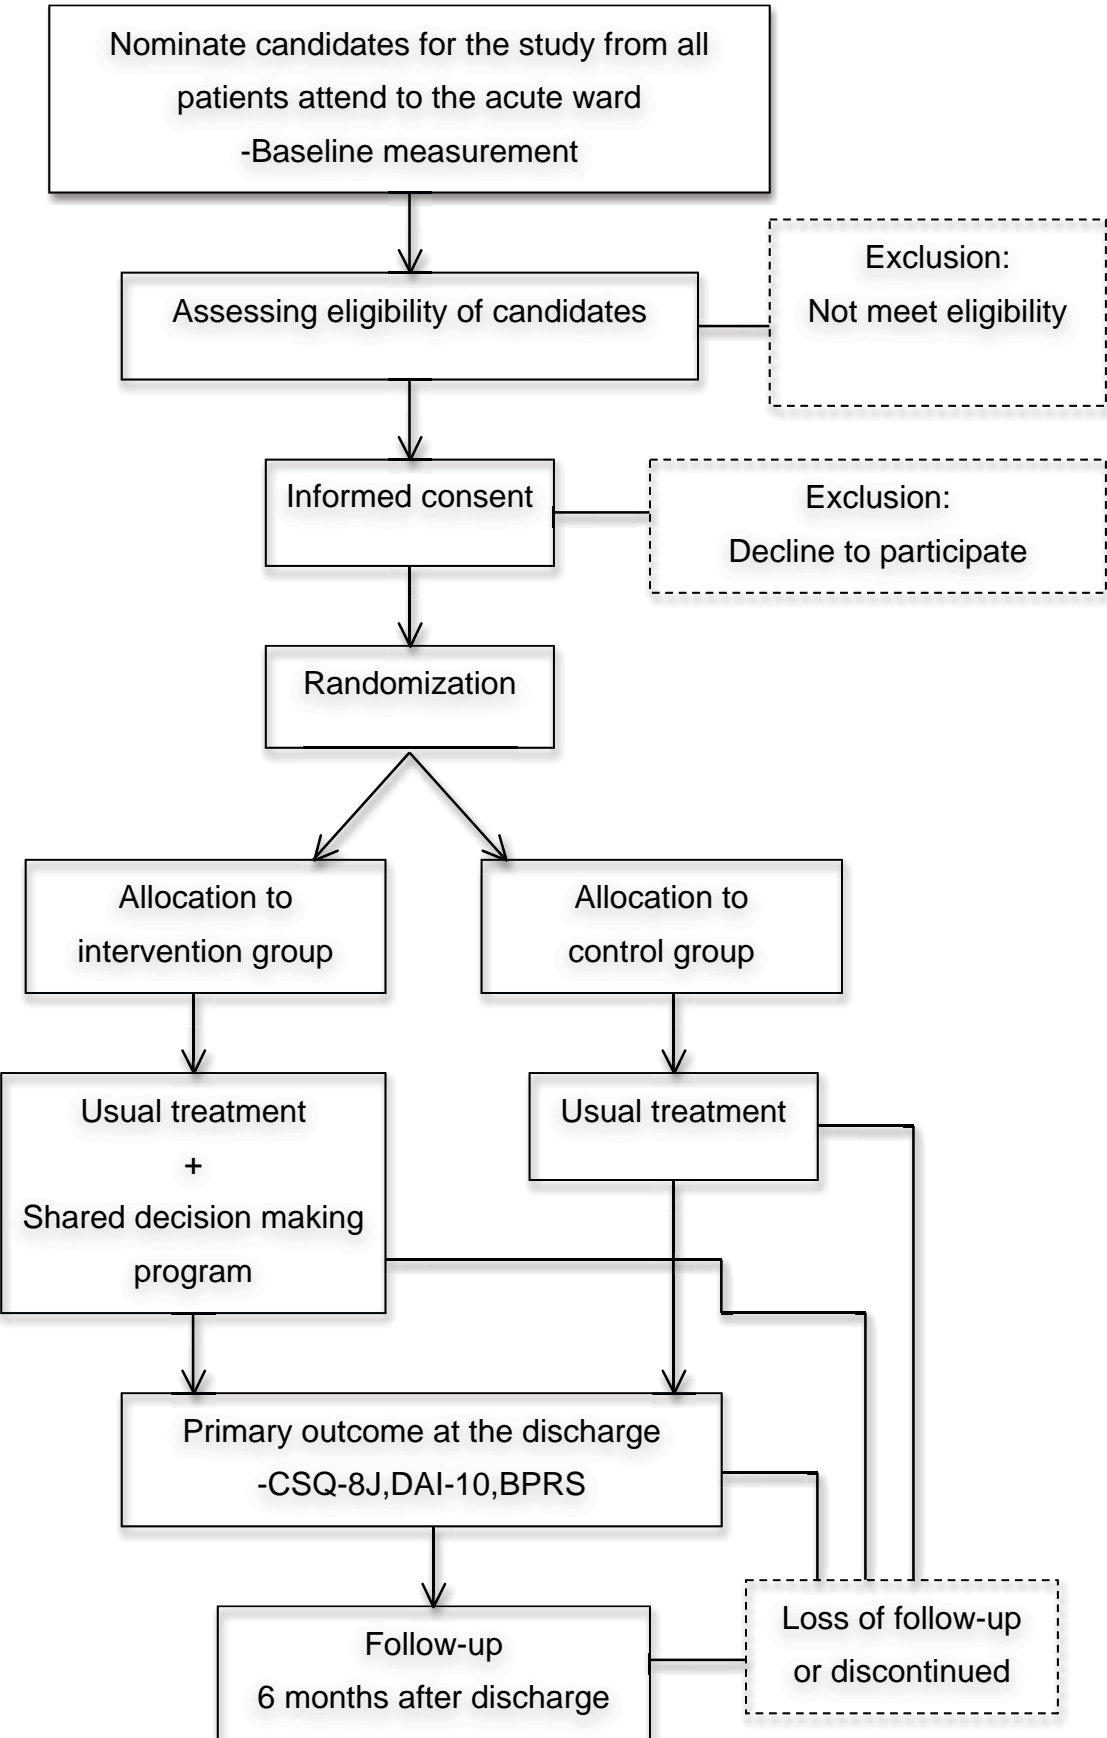

Supplement: MOESM4 [file 9480970]
